# Supplementary material for: Heterogeneous magnitude of immunological memory to SARS‐CoV‐2 in recovered individuals
Source: PubMed Central journal article supplement — Clin Transl Immunology. 2021 May 6;10(5):e1281. doi: 10.1002/cti2.1281 (PMC8101693; doi:10.1002/cti2.1281), 2021-05-06
Supplement: CTI2-10-e1281-s001.pdf [file CTI2-10-e1281-s001.pdf]

**Supplementary information**

Heterogeneous magnitude of immunological memory to SARS-CoV-2 in recovered individuals  
 Mazzone et al. 2021

**Supplementary Table 1: Clinical features of study participants**

|                         | Case | Age | Gender | COVID-19 clinical presentation | Nasopharyngeal swab for SARS-CoV-2 (PCR) on March 2020 | SARS-CoV-2 specific IgG on May 2020 | Days from illness |
|-------------------------|------|-----|--------|--------------------------------|--------------------------------------------------------|-------------------------------------|-------------------|
| <b>Uninfected group</b> | U1   | 66  | M      | asymptomatic                   | na                                                     | negative                            | -                 |
|                         | U2   | 54  | M      | asymptomatic                   | na                                                     | negative                            | -                 |
|                         | U3   | 26  | M      | asymptomatic                   | na                                                     | negative                            | -                 |
|                         | U4   | 39  | M      | asymptomatic                   | na                                                     | negative                            | -                 |
|                         | U5   | 27  | M      | asymptomatic                   | na                                                     | negative                            | -                 |
|                         | U6   | 55  | M      | asymptomatic                   | na                                                     | negative                            | -                 |
|                         | U7   | 61  | M      | asymptomatic                   | na                                                     | negative                            | -                 |
|                         | U8   | 36  | M      | asymptomatic                   | na                                                     | negative                            | -                 |
|                         | U9   | 37  | M      | asymptomatic                   | na                                                     | negative                            | -                 |
|                         | U10  | 32  | M      | asymptomatic                   | na                                                     | negative                            | -                 |
|                         | U11  | 37  | M      | asymptomatic                   | na                                                     | negative                            | -                 |
|                         | U12  | 51  | M      | asymptomatic                   | na                                                     | negative                            | -                 |
|                         | U13  | 21  | M      | asymptomatic                   | na                                                     | negative                            | -                 |
|                         | U14  | 37  | M      | asymptomatic                   | na                                                     | negative                            | -                 |
| <b>Exposed group 1</b>  | EA1  | 33  | M      | asymptomatic                   | positive                                               | positive                            | 162               |
|                         | EA2  | 50  | M      | asymptomatic                   | positive                                               | positive                            | 162               |
|                         | EA3  | 60  | M      | asymptomatic                   | positive                                               | positive                            | 162               |
|                         | EA4  | 22  | M      | mild                           | positive                                               | positive                            | 163               |
|                         | EA5  | 56  | M      | mild                           | positive                                               | positive                            | 162               |
|                         | EA6  | 35  | M      | mild                           | positive                                               | positive                            | 162               |
|                         | EA7  | 34  | M      | mild                           | positive                                               | positive                            | 162               |
|                         | EA8  | 36  | M      | mild                           | positive                                               | positive                            | 162               |
|                         | EA9  | 53  | M      | mild                           | positive                                               | positive                            | 162               |
|                         | EA10 | 66  | M      | mild                           | positive                                               | positive                            | 163               |
|                         | EA11 | 25  | M      | mild                           | positive                                               | positive                            | 162               |
|                         | EA12 | 20  | M      | mild                           | positive                                               | positive                            | 164               |
|                         | EA13 | 56  | M      | moderate (hospitalized)        | positive                                               | positive                            | 163               |
|                         | EA14 | 44  | M      | moderate (hospitalized)        | positive                                               | positive                            | 162               |
|                         | EA15 | 39  | M      | severe (hospitalized)          | positive                                               | positive                            | 162               |
| <b>Exposed group 2</b>  | EB1  | 55  | M      | asymptomatic                   | na                                                     | positive                            | na                |
|                         | EB2  | 22  | M      | asymptomatic                   | na                                                     | positive                            | na                |
|                         | EB3  | 23  | M      | asymptomatic                   | na                                                     | positive                            | na                |
|                         | EB4  | 23  | M      | asymptomatic                   | na                                                     | positive                            | na                |

**Supplementary information**

Heterogeneous magnitude of immunological memory to SARS-CoV-2 in recovered individuals

Mazzoni et al. 2021

|      |    |   |              |    |          |    |
|------|----|---|--------------|----|----------|----|
| EB5  | 23 | M | asymptomatic | na | positive | na |
| EB6  | 43 | M | asymptomatic | na | positive | na |
| EB7  | 45 | M | asymptomatic | na | positive | na |
| EB8  | 22 | M | mild         | na | positive | na |
| EB9  | 23 | M | mild         | na | positive | na |
| EB10 | 28 | M | mild         | na | positive | na |
| EB11 | 23 | M | mild         | na | positive | na |
| EB12 | 23 | M | mild         | na | positive | na |
| EB13 | 41 | M | mild         | na | positive | na |
| EB14 | 21 | M | mild         | na | positive | na |
| EB15 | 30 | M | mild         | na | positive | na |

*na: not available*

**Supplementary information**

Heterogeneous magnitude of immunological memory to SARS-CoV-2 in recovered individuals

Mazzoni et al. 2021

**Supplementary table 2. List of all fluoro-chrome mAbs used for flow cytometric analysis**

| <b>Marker</b> | <b>Clone</b> | <b>Fluoro-chrome</b> | <b>Company</b> |
|---------------|--------------|----------------------|----------------|
| CD8           | SK1          | Super Bright 600     | eBioscience™   |
| CD3           | SK7          | PerCP                | BDBioscience   |
| CD4           | SK3          | PE-Cy™7              | BDBioscience   |
| CD154         | TRAP1        | PE                   | BDBioscience   |
| IFN- $\gamma$ | B27          | Pacific Blue™        | BioLegend      |
| IL-2          | MQ1-17H12    | APC                  | BDBioscience   |
| TNF- $\alpha$ | 6401.1111    | FITC                 | BDBioscience   |

## Supplementary information

Heterogeneous magnitude of immunological memory to SARS-CoV-2 in recovered individuals  
Mazzoni et al. 2021

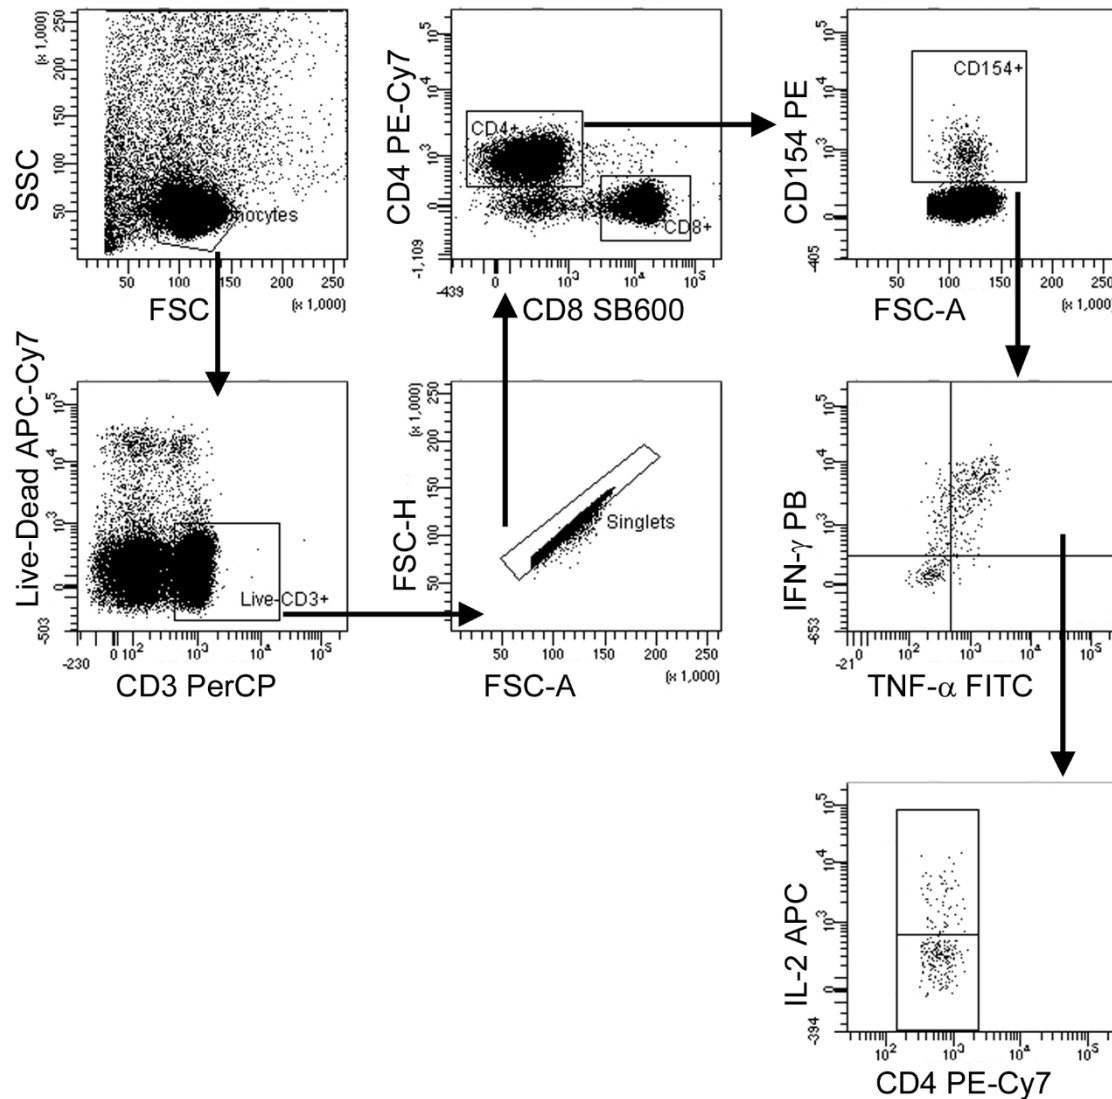

### Supplementary figure 1. Gating strategy for the identification of SARS-CoV-2 specific CD4+ T cells

Lymphocytes were identified based on physical parameters FSC-A and SSC-A. Live CD3+ T cells were subsequently gated using a viability dye (Live-Dead) and CD3. Single cells were then evaluated using FSC-A and FSC-H parameters. T helper cells were identified as CD4+CD8-. Among CD4+ T cells we identified recently activated cells based on CD154 expression. CD4+CD154+ were evaluated for the capacity to produce IFN- $\gamma$  and TNF- $\alpha$ . All the four cell subsets defined by IFN- $\gamma$  and TNF- $\alpha$  production were finally evaluated for their capacity to produce IL-2.
